# Supplementary material for: Hydrogen-bonding interactions of norharmane in mixtures of acetic acid with benzene, p-dioxane and acetonitrileElectronic supplementary information (ESI) available: The kinetic equations for eqns. (1)–(3). See http://www.rsc.org/suppdata/cp/b2/b201526a/
Source: Royal Society of Chemistry journal article supplement (doi:10.1039/b201526a), 2002-06-18
Supplement: schemes.doc [file schemes.doc]

###### Supporting information

**Scheme 1**

The following kinetic equation describes the system represented in scheme 1:

where is rate constant which includes both radiative and nonradiative depopulation mechanism for .

Under steady-state conditions

0

If we consider,

where and are the fluorescence intensity of and , respectively and  and  are constants including both photophysical parameters and the instrumental characteristics at the and emission wavelength, respectively.

which predicts linear variations of / with acetic acid concentration.

**Scheme 2**

For this scheme the kinetic equation is:

Where, is rate constant which includes both radiative and non-radiative depopulation mechanism for . Under steady-state conditions

0

which predicts quadratic variation of / with acetic acid concentration.

**Scheme 3**

In this scheme, in formation two molecules of acetic acid are implied, but there is an intermediate step in which is formed. The kinetic equations are:

where and are rate constants which include both radiative and non-radiative depopulation mechanism for and .

Under steady-state conditions

Similarly to scheme 1:

which predicts linear variations of / with 1/[AcH] and /with acetic acid concentration.
